# Supplementary material for: Turning point: A new global COVID‐19 wave or a signal of the beginning of the end of the global COVID‐19 pandemic?
Source: PubMed Central journal article supplement (PMC8962637; doi:10.1002/iid3.606), 2022-03-29
Supplement: IID3-10-e606-s001.pdf [file IID3-10-e606-s001.pdf]

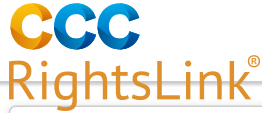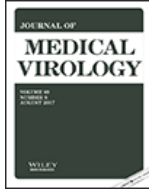

### Characterization of the novel SARS-CoV-2 Omicron (B.1.1.529) variant of concern and its global perspective

Author: Shailendra K. Saxena, Swatantra Kumar, Saniya Ansari, et al  
 Publication: Journal of Medical Virology  
 Publisher: John Wiley and Sons  
 Date: Jan 11, 2022

© 2022 Wiley Periodicals LLC

#### Order Completed

Thank you for your order.

This Agreement between Mr. jerry ding ("You") and John Wiley and Sons ("John Wiley and Sons") consists of your license details and the terms and conditions provided by John Wiley and Sons and Copyright Clearance Center.

Your confirmation email will contain your order number for future reference.

**License Number** 5240780143039 [Printable Details](#)  
**License date** Feb 02, 2022

#### ✔ Licensed Content

**Licensed Content Publisher** John Wiley and Sons  
**Licensed Content Publication** Journal of Medical Virology  
**Licensed Content Title** Characterization of the novel SARS-CoV-2 Omicron (B.1.1.529) variant of concern and its global perspective  
**Licensed Content Author** Shailendra K. Saxena, Swatantra Kumar, Saniya Ansari, et al  
**Licensed Content Date** Jan 11, 2022  
**Licensed Content Volume** 0  
**Licensed Content Issue** 0  
**Licensed Content Pages** 7

#### 📄 Order Details

**Type of use** Journal/Magazine  
**Requestor type** University/Academic  
**Is the reuse sponsored by or associated with a pharmaceutical or medical products company?** no  
**Format** Print and electronic  
**Portion** Figure/table  
**Number of figures/tables** 2  
**Will you be translating?** Yes, including English rights  
**Number of languages** 1  
**Circulation** 1 - 29

#### 📄 About Your Work

**Title of new article** Turning point: a new global COVID-19 wave or a signal of the beginning of the end of the global COVID-19 pandemic?  
**Lead author** Kaixi Ding  
**Title of targeted journal** Immunity, Inflammation and Disease  
**Publisher** John Wiley and Sons Ltd  
**Expected publication date** Feb 2022

#### 📄 Additional Data

**Order reference number** 6  
**Portions** Figure 1, on page 4.  
**Specific Languages** English

| 📍 Requestor Location      |                                                         | 📄 Tax Details    |             |
|---------------------------|---------------------------------------------------------|------------------|-------------|
|                           | Mr. jerry ding<br>sichuan province chengducity<br>china | Publisher Tax ID | EU826007151 |
| <b>Requestor Location</b> | chengdu, 86<br>China<br>Attn: Mr. jerry ding            |                  |             |
| \$ Price                  |                                                         |                  |             |
| <b>Total</b>              | 0.00 USD                                                |                  |             |

Would you like to purchase the full text of this article? If so, please continue on to the content ordering system located here: [Purchase PDF](#)  
 If you click on the buttons below or close this window, you will not be able to return to the content ordering system.

**Total: 0.00 USD**

CLOSE WINDOW
ORDER MORE
